# Supplementary material
Source: publisher figshare collection journal article supplement (https://karger.figshare.com/articles/dataset/_/4750711)
Supplement: Supplementary file 1 [file 1]

# SUPPLEMENTARY MATERIALS

Figure S1

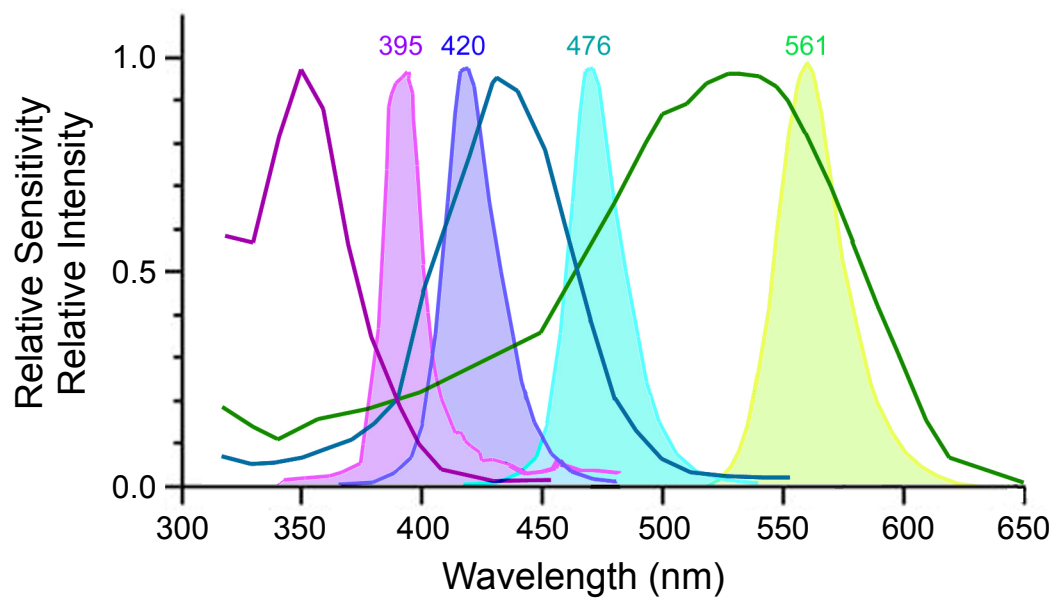

Emission spectra of LEDs with peak wavelengths of 395, 420, 476 and 561 nm as shown. Overlaid are the spectral sensitivities of the three *Bombus impatiens* photoreceptors (after Skorupski and Chittka, 2010).

Figure S2

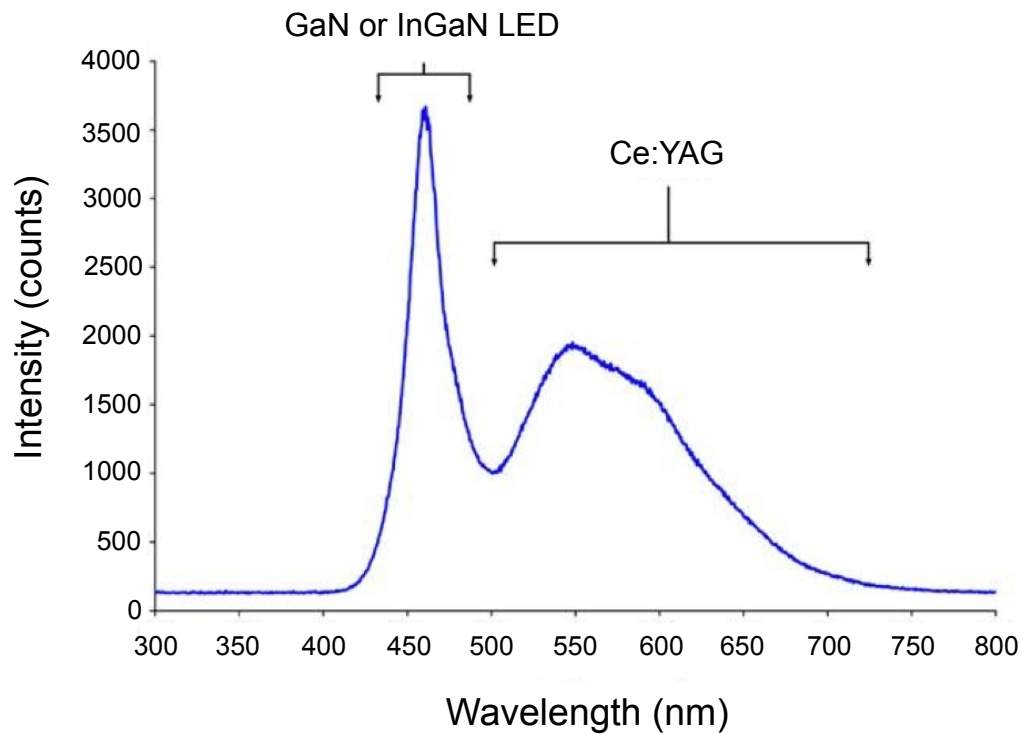

Emission spectra of "white" (broad-spectrum emitting) LED used in visual enrichment treatments.
