# Supplementary material
Source: publisher figshare collection journal article supplement (https://karger.figshare.com/articles/dataset/_/4750711)
Supplement: Supplementary file 1 [file 1]

## Sheet: Sheet1
Table S1. Significance values from factorial ANOVA for brain subregions in sensory treatments.
Relative to Total Brain
	Medulla	Lobula	Antennal Lobe	Medial MB Calyx	Lateral MB Calyx	MB Calyces	MB Lobes	MB Total	Central Body	Cell Bodies	Neuropil (rest)
Vis Effect	0.302	0.493	<0.001***	0.005**	0.056	0.011*	0.010*	0.004**	0.786	0.005**	0.499
Olf Effect	0.657	0.062	0.833	0.174	0.517	0.694	0.193	0.792	0.113	0.523	0.892
Vis*Olf	0.206	0.412	0.223	0.158	0.258	0.167	0.721	0.249	0.259	0.348	0.452
Relative to Total Brain - Region of Interest
	Medulla	Lobula	Antennal Lobe	Medial MB Calyx	Lateral MB Calyx	MB Calyces	MB Lobes	MB Total	Central Body	Cell Bodies	Neuropil (rest)
Vis Effect	0.293	0.485	<0.001***	0.005**	0.055	0.011*	0.010*	0.004**	0.786	0.005**	0.496
Olf Effect	0.65	0.063	0.826	0.175	0.513	0.705	0.196	0.784	0.113	0.523	0.896
Vis*Olf	0.202	0.414	0.222	0.161	0.259	0.171	0.717	0.254	0.259	0.348	0.461
Relative to Neuropil (rest)
	Medulla	LobulaŦ	Antennal Lobe	Medial MB Calyx	Lateral MB CalyxŦ	MB CalycesŦ	MB Lobes	MB TotalŦ	Central BodyŦ	Cell Bodies
Vis Effect	0.854	0.975	<0.001***	0.005**	0.303	0.124	0.149	0.11	0.966	0.032*
Olf Effect	0.852	0.22	0.843	0.174	0.681	0.745	0.413	0.922	0.15	0.621
Vis*Olf	0.137	0.243	0.141	0.158	0.2	0.138	0.412	0.185	0.126	0.841
Relative to Neuropil (rest) + Cell Bodies
	Medulla	Lobula	Antennal Lobe	Medial MB Calyx	Lateral MB Calyx	MB Calyces	MB Lobes	MB Total	Central Body	Cell Bodies	Neuropil (rest)
Vis Effect	0.045*	0.064	<0.001***	0.002**	0.016*	0.004**	0.003**	0.002**	0.169	0.025*	0.025*
Olf Effect	0.543	0.116	0.636	0.427	0.468	0.997	0.218	0.628	0.266	0.614	0.614
Vis*Olf	0.131	0.21	0.123	0.117	0.178	0.129	0.358	0.166	0.136	0.819	0.819
Relative to All Neuropil (Total Brain - Cell Bodies)
	Medulla	LobulaŦ	Antennal Lobe	Medial MB Calyx	Lateral MB Calyx	MB CalycesŦ	MB Lobes	MB TotalŦ	Central Body	Cell Bodies	Neuropil (rest)
Vis Effect	0.239	0.166	<0.001***	0.042*	0.497	0.119	0.225	0.083	0.395	0.005**	0.182
Olf Effect	0.968	0.076	0.97	0.065	0.668	0.395	0.276	0.89	0.065	0.526	0.784
Vis*Olf	0.372	0.788	0.343	0.205	0.383	0.226	0.861	0.401	0.382	0.348	0.111
Values within each sub-table correspond to the p-value obtained from two-way ANOVA with visual, olfactory,
and visual*olfactory factors.
* p<0.05, ** p<0.01, *** p<0.001
When necessary, data were transformed to meet the assumptions of parametric statistical analysis.
Columns marked with Ŧ indicate these data failed a Shapiro-Wilk test for normality (p<0.05) and were unable
to be corrected with standard transformations. These data have equal variance for ANOVA.
